# Supplementary material for: Identification and Functional Characterization of Genes Involved in the Biosynthesis of Caffeoylquinic Acids in Sunflower (Helianthus annuus L.)
Source: PubMed Central journal article supplement (PMC6685037; doi:10.3389/fpls.2019.00968), 2019-07-31
Supplement: Data_Sheet_1.pdf [file Data_Sheet_1.pdf]

*Supplementary Material*

A

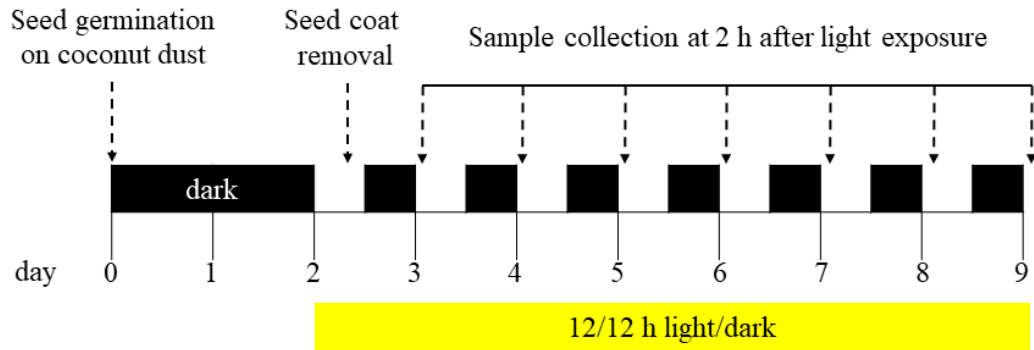

B

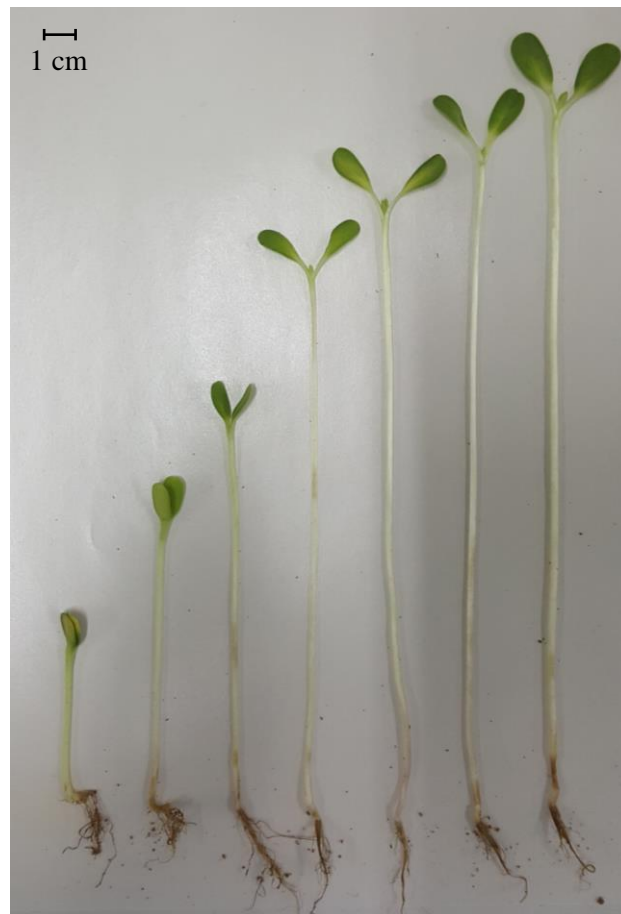

**Supplementary FIGURE S1 | Sunflower sprouts used in this study.** Schematic diagram of sampling in this study (A) and the representative sunflower sprouts were imaged at different timepoints (day 3 to day 9, from left to right respectively) during their germination period (B).

|         |                                                                |     |
|---------|----------------------------------------------------------------|-----|
| SlHQT   | -MG--SEKMMKINIKESTLVKPSKPTPT--KRIWSSNLDLIVGRIHLLTVYFYKPNGSSN   | 55  |
| CcsHQT1 | -----MELTVKESLMVKPSKPTPN--QRLWNSNLDLVVGRIHILTVYFYRPNSSN        | 49  |
| CcsHQT2 | -MGSDQKMMMNIDIMKSSIVPPSELIADCPKQLWTSNLDLVVGRIHILTVYFYRPNSSK    | 59  |
| CcsHQT3 | -----MNINIKHSSSFVQPSQPTPS--STIWTSNLDLVVGRIHILTVYFYRPNSSN       | 49  |
| CcsHCT1 | -----MKIEVRESTMVRPAEETPR--INLWNSNVDLVVVPNFHTPSVYFYRPNSSN       | 49  |
| CcsHCT2 | -----MKIAVRESTMVRPAEETPM--IKLWNSNVDLVVVPNFHTPSVYFYRPTGAGN      | 49  |
| CiHQT1  | MTNGAGSEKMKVTVKESVIVKPSKTPPI--QRLWNSNIDLLVGRIHLLTIYFYRPNSSD    | 58  |
| CiHQT2  | -MRSDQKMMMNINLKKSSIIPPSETIAECPKQLWTSNLDLVVGRIHILTVYFYRPNSSN    | 59  |
| CiHQT3  | -MGSD-HKTMKINIKQSSLVQPSKPTIPSNKKLWTSNLDLVVGRIHILTVYFYRPNSSN    | 58  |
| CiHCT1  | -----MKIEVRESTMVRPAEETPK--INLWNSNVDLVVVPNFHTPSVYFYRPNSSN       | 49  |
| CiHCT2  | -----MKIAIRESTMVRPAEETPR--IKLWNSNVDLVVVPNFHTPSVYFYRPTGATN      | 49  |
| HaHQT1  | -----MNLTVKQSLTIKPSKTPC--HTIWCSNLDLIVGRIHIQTIVYFYRPNSSN        | 49  |
| HaHQT2  | -MKTDQTKPMNITITKSSIVPPSETINGSSNIWTSNLDLVVGRIHILTVYFYRPNSSN     | 59  |
| HaHQT3  | -MGTV-QKTLNINIKQTTTFVQPSKPTQASTKQLWTSNLDLVVGRIHILTVYFYRPIVCSN  | 58  |
| HaHCT1  | -----MKIEVRESTMVKPAEETPK--INLWNSNVDLVVVPNFHTPSVYFYRPNSSN       | 49  |
| HaHCT2  | -----MKITVTNNSMVRPAEETPR--IKLWNSNVDLVVVPNFHTPSVYFYRPNSSN       | 49  |
|         | ::: : .: : *:: : *:: : *:: : *:: : *:: : *                     |     |
| SlHQT   | FFDNKVIKEALS NVLVSFYPMAGRLGRDEQGRIEVNCNGEGVLFVEAESDSCVDDFGDFT  | 115 |
| CcsHQT1 | FFDSGVLKALADVLVSFFPMAGRLGNDGDGRVEINCNGEGVLFVEAEADCSIDDFGEIT    | 109 |
| CcsHQT2 | FFDPNVMKALADVLVSFYPMAGRLGRDETDRIVINCNNEGVLFVEAESDSTLDDDFGELK   | 119 |
| CcsHQT3 | FFDADVMKALADVLVSFYPMAGRISRDRNGRLEINCNGEGVLFVEAELDSTLDDDFGEFT   | 109 |
| CcsHCT1 | FFDPKVMKDALS RALVPFYPMGGRLKRDEDEGRIEIDCQGGVLFVEAESDGMIDDFGDFA  | 109 |
| CcsHCT2 | FFDPTVMKDALS RVLVPFYPMGGRLSRDEDEGRIEIDCRGQGVLFVEAESDGMIDDFGDFA | 109 |
| CiHQT1  | FFDSGVLKALSDVLVSFFPMAGRLGKDGDRVEINCNAEGVLFVEAEADCRIDDFGEIT     | 118 |
| CiHQT2  | FFDPNVMKALADVLVSFYPMAGRLDRDESGRIVINCNGEGVLFVEAESDSTLDDDFGEFT   | 119 |
| CiHQT3  | FFDPVVMKALADVI VSFYPFAGRLSRDQNGRLEINCNGEGVLFVEAESDSTLDDDFGEFT  | 118 |
| CiHCT1  | FFDPKVMKDALS KALVPFYPMGGRLKRDEDEGRIEIDCQGGVLFVEAESDGMVDDFGDFA  | 109 |
| CiHCT2  | FFDAKVMKDALS RALVPFYPMGGRLKRDEDEGRIEIDCQGGVLFVEAESDGMVDDFGDFA  | 109 |
| HaHQT1  | FFDSEVLKAALADVLVSFYPMGRLGKDGDRVEIVCNGEGVLFVEAEADCCIDDFGEIT     | 109 |
| HaHQT2  | YFDPNVMKQALADVLVPFYPMAGRLGRDESGRIVINCNGEGALFVEAESDSCVDDDFGEFT  | 119 |
| HaHQT3  | FFDPLVMKALADVLVTFYPMAGRMGKDQNGKVVINCNDEGVLFVEAESDSTLDDDFGEFT   | 118 |
| HaHCT1  | FFDPKVMKDALS RALVPFYPMGGRLKRDEDEGRIEIDCRGQGVLFVEAESDGMVDDFGDFA | 109 |
| HaHCT2  | FFDPKVMIKALS KALVPFYPMGGRLTRDEDEGRIEIDCQGGVLFVEAESDGMVDDFGDFA  | 109 |
|         | :** * : ** : .:* *:: : ** : .* .:: : * . :*.***** * :***:::    |     |
| SlHQT   | PSLELRKLIPSVETSGDISTFPLVIF-----QITRFKCGGVALGGGVFHTLSDGLSSI     | 169 |
| CcsHQT1 | PSPELRKLAPTVDYSDQVSSYPLCIT-----QVTRFNCGGVSLGCGLHHTLSDGLSSLH    | 163 |
| CcsHQT2 | PSPVFRQLTSPVDYSGDISSYPLFA-----QVTHFKCGGVALGCGVHHTLSDGLSLLH     | 173 |
| CcsHQT3 | PSPELRRLTPTVDYSGDISSYPLFFA-----QVTHFKCGGVALGCGVFHALADGLSSI     | 163 |
| CcsHCT1 | PTLELRKLIPAVDYTLGIESYLLVL-----QVTFKCGGVS LGVGMQHHAADGASGLH     | 163 |
| CcsHCT2 | PTLELRKLIPAVDYS LGIESYLLVL-----QVTFKCGGVS LGVGMQHHAADGASGLH    | 163 |
| CiHQT1  | PSPELRRLAPTVDYSGDISSYPLFIT-----QVTRFNCGGVSLGCGLHHTLSDGFSSLH    | 172 |
| CiHQT2  | PSPEFRRLTPTVDYSGDISSYPLFFA-----QVTHFKCGGVALGCGVFHTLSDGLSSLH    | 173 |
| CiHQT3  | PSPELRSLTPTVDYSGDISSYPLFFA-----QVTHFKCGGVALGCGVFHTLADGLSSI     | 172 |
| CiHCT1  | PTLELRKLIPAVDYSQGIESYLLVL-----QVTFKCGGVS LGVGMQHHAADGASGLH     | 163 |
| CiHCT2  | PTLELRKLIPAVDYS LGIESYLLVL-----QVTFKCGGVS LGVGMQHHAADGASGLH    | 163 |
| HaHQT1  | PSPELRRLAPTVDYSGDISSYPLFVT-----QVTRFNCGGVSLGSALHHTLADGLSALH    | 163 |
| HaHQT2  | PSPEFRSLTPTVDYSGDISSYPLFFA-----QVTHFKCGGVALGCGVFHTLSDGLSSLH    | 173 |
| HaHQT3  | PSPELRRLTPTVDYSGDISSYPLFFAQVYWFQVTHFKCGGVALGCGVFHTLADGLSSLH    | 178 |
| HaHCT1  | PTLELRKLIPAVDYSQGIESYLLVL-----QVFNKFCGGVS LGVGMQHHAADGASGLH    | 163 |
| HaHCT2  | PTLELRKLIPVVDYTLGIGSYLLVL-----QVTFKCGGVS LGVGMQHHAADGASGLH     | 163 |
|         | *: : * * *: : : : * . * : ****.* * : * :* * :*                 |     |

**Supplementary FIGURE S2 | Multiple sequence alignment of HQTs and HCTs from sunflower (HaHQTs and HaHCTs) and other representative species.** Amino acid sequences of HaHQTs and HaHCTs are shown and aligned with those from other representative species including tomato (SlHQT; NP\_001234850.2), globe artichoke (CcsHQT1; ABK79689.1, CcsHQT2; ADL62854.1, CcsHQT3; ADL62855.1, CcsHCT1; AAZ80046.1, and CcsHCT2; KVH99042.1), and chicory (CiHQT1; ANN12610.1, CiHQT2; ANN12611.1, CiHQT3; ANN12612.1, CiHCT1; ANN12608.1, and CiHCT2; ANN12609.1).

|         |                                                                 |     |
|---------|-----------------------------------------------------------------|-----|
| SlHQT   | FINTWSDIARGLSVAVPPFIDRTLLRARDPPTSSFEHVEYHPPPTLNSSKNR-----       | 221 |
| CcsHQT1 | FINTWSDKARGLSVAIPPPFIIDRSLLRARDPPTAMFEHLEYHSPPSLIAPSQNQNF-TSHP  | 222 |
| CcsHQT2 | FINTWSDMARGLSVAIPPPFIERTLLRAREPPTPTYDHVEYHSPPSMNTTAQKPGS-GSL-   | 231 |
| CcsHQT3 | FINTWSDMARGLSIAIPPPFIIDRTLLRAREPPTPTFDHIEYHAPPSMKTISQNPE-S---   | 219 |
| CcsHCT1 | FINTWSDLARGLDLAVPPFIDRTLLRSRDPQPAPFDHIEYQPAPPMKTAPTPTPTDDES     | 223 |
| CcsHCT2 | FINAWSDMARGLDLTLPPFIDRTLLQARDPPVPVFEHVEYQPAPPMKLAPKSA-----S     | 217 |
| CiHQT1  | FINTWSDVARGLSVAIPPFNDRTLRARDPPTPMFDHVEYHPPPSLITPPENHK-----      | 226 |
| CiHQT2  | FINTWSDMARGLSVAIPPPFIERTLLRAREPPTPTHDHVEYHEPPSMPTTQKSGS-GS--    | 230 |
| CiHQT3  | FINTWSDMTRGLSIAVPPFTDRTLRARETPTPTFDHVEYHLPPTMNTTSQNPKS-S---     | 228 |
| CiHCT1  | FINTWSDMARGLDLTIPPPFIIDRTLLRARDPQPAPFEHVEYQPAPQMKTTSS--KSTDEQPV | 221 |
| CiHCT2  | FINTWSDMARGLDVSLPPFIDRTLLRAQDPPRPVFEHVEYQPAPPMKSTSEST-----S     | 217 |
| HaHQT1  | FINTWSDKARGLTVAVPPFVDRTLLRARDPPTPMFDHVEYHQPPSMIAPLENQKS-TSDP    | 222 |
| HaHQT2  | FINTWSDVARGLSVAIPPPFIIDRTLLRARDPPTPTHDHVEYHPPPTMITTQ---KT-GSL-  | 228 |
| HaHQT3  | FINTWSDMARGLSIAIPPPFIIDRTLLRAREPPTPTFDHVEYHPPPSMKPDSQKPE-S---   | 234 |
| HaHCT1  | FINTWSDMARGLDITIPPFIDRTLLRARDPQPVPFDHIEYQPAPPMKNAP--TTTNDQPV    | 221 |
| HaHCT2  | FINAWSDMARGLDITLLPFIDRTLLKARDPQPVPFEHVEYQPAPPMKSLPEVE-----S     | 217 |
|         | ***:*** :*** :: * :*:***:: * .*:***: * :                        |     |
| SlHQT   | ESSTTMLKFSSEQLGLLKSkskNEG-----STYEILAAHIWRCCKARGLPEDQLTKLH      | 276 |
| CcsHQT1 | KLASTAMLRRLTLDDQINGLKSskakGDS-VYHSTYEILAAHLWRCACEARGLSDDQPTKLY  | 281 |
| CcsHQT2 | SKSSTTMLKLTLDQNLNLSKAKAKSEG-STHSTYEILAAHIWRCACKARGLPDDQLSKLY    | 290 |
| CcsHQT3 | RKPSTTVLKLTLDDQNLNLSKAKAKGDSNTTYSTYEILAAHLWRCACKARGLPDDQLTKLY   | 279 |
| CcsHCT1 | PETTVSIFKLTRDQVNLKSKSKEDGNTVNYSSYEMLSGHVWRCVCKARGLPDDQDTKLY     | 283 |
| CcsHCT2 | DETVVSFVKLTRDQNLNLSKAKSKEDGNTINYSSYEMLSGHVWRSVCKARGLKDDQDTKLY   | 277 |
| CiHQT1  | PPATTTILRLTLDDQINDLKSskGKGDGS-VYHSTFVI IAAHLWRSACKARGLSDDQPTKLY | 285 |
| CiHQT2  | ---STTMLKLTLDQNLNLSKAKAKIEG-QTHSTYEILAAHIWRCACKARGLPDDQLTKLY    | 286 |
| CiHQT3  | RKPSTNMLKLTIDQNLNLSKAKAKGDSNTTYSTYEILAAHLWRCACKARGLPDDQDTKLY    | 288 |
| CiHCT1  | PETAVAI FKLTRDQNLNLSKAKSKENGNTINYSSYEMLSGHVWRCVCKARNLPADQDTKLY  | 281 |
| CiHCT2  | DETVVSFVKLTRDQNLNLSKAKSKAGNTINYSSYEMLSGHVWRSVCKARGLPEDQDSKLY    | 277 |
| HaHQT1  | KSASTMMLRRLTLDDQINDLKSskakGDS-AYHSTYEILAAHIWRCACKARGLSDDQPTKLY  | 281 |
| HaHQT2  | SKSSTTMLKLTLDQNLNLSKAKAKSEG-ASYSTYETLAAHIWRCACKARGLPDDQLTKLY    | 287 |
| HaHQT3  | RKPSTTILKLTLDQNLNLSKAKAKGDSNTTYSTYEILAAHLWRCACKARGLPDDQLTKLY    | 294 |
| HaHCT1  | PETAVSIFKLTRDQNLNLSKAKSKAGNTISYSSYEMLSGHVWRCVCKARGLPDDQDTKLY    | 281 |
| HaHCT2  | DETVVSIFKLTRDQNLNLSKAKSKEDGNAINYSSYEMLSGHVWRSVCKARGLTNDHDTKLY   | 277 |
|         | . :::: :*. * . * : : :*. * . * . * : : :*                       |     |
| SlHQT   | VATDGRSRLCPPLPPGYLGNVVFATPIAKSCELQSEPLTNSVKRIHNELIKMDD-NYLR     | 335 |
| CcsHQT1 | VATDGRSRLNPPLPPGYLGNVVFATPIAKSGEFKSESLADTARRIHSELAKMDD-QYLR     | 340 |
| CcsHQT2 | VATDGRSRLSPRLPPGYLGNVVFATPVAKSGDLTSKLSNTAKLIHTTLTKMDD-DYLR      | 349 |
| CcsHQT3 | VATDGRSRLSPQLPPGYLGNVVFATPVAKSGDLTQSLNSAASLIRTLTKMDD-NYLR       | 338 |
| CcsHCT1 | IATDGRARLRPSLPRGYFGNVI FTTTPIAVAGDLQSKPTWYAASKIHDALARMDD-DYLR   | 342 |
| CcsHCT2 | IATDGRARLQPALPAGYFGNVI FTTTPIAVAGELQSKPTWYAASKIHDALARMNN-DYLR   | 336 |
| CiHQT1  | VATDGRSRLIPPLPCGYLGNVLF TTTT PMAKSGEFKSESLADTARRIHTELARMDD-QYMR | 344 |
| CiHQT2  | VATDGRSRLSPRLPPGYLGNVVFATPVAKSGDLTSGLSNTAKLIHTTLTKMDD-DYLR      | 345 |
| CiHQT3  | VATDGRSRLSPQLPPGYLGNVVFATPVAKSGELTQPLSNSASLIRSTLSKMDN-EYLR      | 347 |
| CiHCT1  | IATDGRARLRPSLPPGYFGNVI FTTTPIAVAGELMSNPTWYAAGKIHDGLAKMDN-DYLR   | 340 |
| CiHCT2  | IATDGRARLQPALPPGYFGNVI FTTTPIAAGDLQSKPTWYAASKIHDALVKMDN-DYLR    | 336 |
| HaHQT1  | VATDGRSRLNPPLPRGYLGNVIFTATPIMKVGEFKESESLGDTARRIHNEGLRMNXXXYLR   | 341 |
| HaHQT2  | VATDGRSRLSPHLPRGYLGNVVFATPVAKSGTLTSDSLVNAAKLIHTTLTKMDD-DYLR     | 346 |
| HaHQT3  | VATDGRSRLSPQLPPGYLGNVVFATPIAKSADLTTQPLANAASLIRTTLSKMDN-DYLR     | 353 |
| HaHCT1  | IATDGRARLRPSLPPGYFGNVI FTTTPIAVAGDLQSKPTWYAAGKIHDALARMDD-DYLR   | 340 |
| HaHCT2  | IATDGRARLQPALPSGYFGNVI FTTTPIAVAGELQSKPTWYAASKIHEALAKMNN-DYLR   | 336 |
|         | :*****:* * ** **:*:*:*:*:*: : : . * : * * : * : *               |     |

**Supplementary FIGURE S2 | Multiple sequence alignment of HQTs and HCTs from sunflower (HaHQTs and HaHCTs) and other representative species.** Amino acid sequences of HaHQTs and HaHCTs are shown and aligned with those from other representative species including tomato (SlHQT; NP\_001234850.2), globe artichoke (CcsHQT1; ABK79689.1, CcsHQT2; ADL62854.1, CcsHQT3; ADL62855.1, CcsHCT1; AAZ80046.1, and CcsHCT2; KVH99042.1), and chicory (CiHQT1; ANN12610.1, CiHQT2; ANN12611.1, CiHQT3; ANN12612.1, CiHCT1; ANN12608.1, and CiHCT2; ANN12609.1). (continue)

|         |                                                              |     |
|---------|--------------------------------------------------------------|-----|
| SlHQT   | SALDYLELQPDLSLIRGPAYFASPNLNINSWTRLPVHECDFGWGRPIHMGPAACILYEGT | 395 |
| CcsHQT1 | SAIDYLELQPDLTALVRGPTYFASPNLNINSWTRLPIYESDFGWGRPIFMGPASILYEGT | 400 |
| CcsHQT2 | SAIDYLESQPDLALIRGPSYFASPNLNINAWTRLVPYDADLGWGRPIFMGPACILYEGT  | 409 |
| CcsHQT3 | SAIDYPEVQPDLSALIRGPSYFASPNLNINTWTRLPVHDADFGWGRPVFMGPACILYEGT | 398 |
| CcsHCT1 | SALDYLELQPDLKALVRGAHTFKCPNLGITSWARLPIHDADFGWGRPIFMGPGGIAYEGL | 402 |
| CcsHCT2 | SALDYLELQPDLKALVRGAHTFKCPNLGITSWARLPIHDADFGWGRPIFMGPGGIAYEGL | 396 |
| CiHQT1  | SAIDYLELQDLALVRGPTYFASPNLNINSWTRLPLYESDFGWGRPIFMGPANILYEGT   | 404 |
| CiHQT2  | SAIDYLESQKDLALIRGPSYFASPNLNINAWTRLPVHDADFGYGRPIFMGPAQILYEGT  | 405 |
| CiHQT3  | SAIDYLEVQPDLSALIRGPSYFASPNLNINTWTRLPVHDADFGWGRPVFMGPAVILYEGT | 407 |
| CiHCT1  | SALDYLELQPDLKALVRGAHFRCPNLGITSWARLPIHDADFGWGRPIFMGPGGIAYEGL  | 400 |
| CiHCT2  | SALDYLELQPDLKALVRGAHTFKCPNLGITSWARLPIHDADFGWGRPIFMGPGGIAYEGL | 396 |
| HaHQT1  | SAIDYLESITDLSTLVRGPSYFASPNLNINSWTRLPIYDSDFGWGRPIFMGPASILYEGT | 401 |
| HaHQT2  | SAIDYLETQPDIALIRGPSYFASPNLNINAWTRLPVHDADFGWGRPIFMGPATILYEGT  | 406 |
| HaHQT3  | SAIDYLEVQPDLSALIRGPSYFASPNLNINTWTRLPVHDADFGWGRPVFMGPACILYEGT | 413 |
| HaHCT1  | SALDYLELQPDLKALVRGAHTFKCPNLGITSWARLPIHDADFGWGRPIFMGPGGIAYEGL | 400 |
| HaHCT2  | SALDYLELQSDLKALVRGAHTFKCPNLGITSWARLPIHDADFGWGRPIFMGPGGIAYEGL | 396 |
|         | **:* * * :*:** * .***.:*:***:..*:*:***:****. * :**           |     |
| SlHQT   | IYIIPSPNSKDRNRLAVCLDAGHMSLFKLYEL                             | 430 |
| CcsHQT1 | IYIIPSPSG-DRSVSLAVCLDPDHMSLFRKLYDF                           | 434 |
| CcsHQT2 | IYVLPSPNN-DRSVSLAVCLDANEQPLFEKFLYEF                          | 443 |
| CcsHQT3 | IYVLPSPNN-DRSMLAVCLDADEQPLFEKFLYDF                           | 432 |
| CcsHCT1 | SFVLPSPIN-DGSLSIVISLQAEHMKLFSKFLYDI                          | 436 |
| CcsHCT2 | SFVLPSPIN-DGSLSIAISLQSEHMKLFSKFLYDI                          | 430 |
| CiHQT1  | IYIIPSPTD-DRSLKLAVCLDSDHMSLFQKLYDF                           | 438 |
| CiHQT2  | VYVLPSPNN-DRSVSLAVCLDANEQPLFEKFLYEM                          | 439 |
| CiHQT3  | IYVLPSPNN-DRSMLAVCLDADEQPLFEKFLYEF                           | 441 |
| CiHCT1  | SFVLPSPIN-DGSLSIAISLQAEHMKVFSKFLYDI                          | 434 |
| CiHCT2  | SFVLPSPVN-DGSLWIAISLLGEHMKLFSKFLYDI                          | 430 |
| HaHQT1  | IYILPGPGG-DRSVALAVCLDPDHMALFKERLYDF                          | 435 |
| HaHQT2  | VYVLPSPNN-DRSVSLAVCLDAKEQPLFEKLYEL                           | 440 |
| HaHQT3  | IYVLPSPNN-DRSMLAVCLDADEQPLFEKFLYDF                           | 447 |
| HaHCT1  | SFVLPSPDN-DGSLSIAISLQAEHMKLFSNLLYDI                          | 434 |
| HaHCT2  | SFVLPSPIN-DGSLSIAISLQAQHMKLFSNLYDI                           | 430 |
|         | ::*.* . * .: :..* . :* :***:                                 |     |

**Supplementary FIGURE S2 | Multiple sequence alignment of HQTs and HCTs from sunflower (HaHQTs and HaHCTs) and other representative species.** Amino acid sequences of HaHQTs and HaHCTs are shown and aligned with those from other representative species including tomato (SlHQT; NP\_001234850.2), globe artichoke (CcsHQT1; ABK79689.1, CcsHQT2; ADL62854.1, CcsHQT3; ADL62855.1, CcsHCT1; AAZ80046.1, and CcsHCT2; KVH99042.1), and chicory (CiHQT1; ANN12610.1, CiHQT2; ANN12611.1, CiHQT3; ANN12612.1, CiHCT1; ANN12608.1, and CiHCT2; ANN12609.1). (continue)

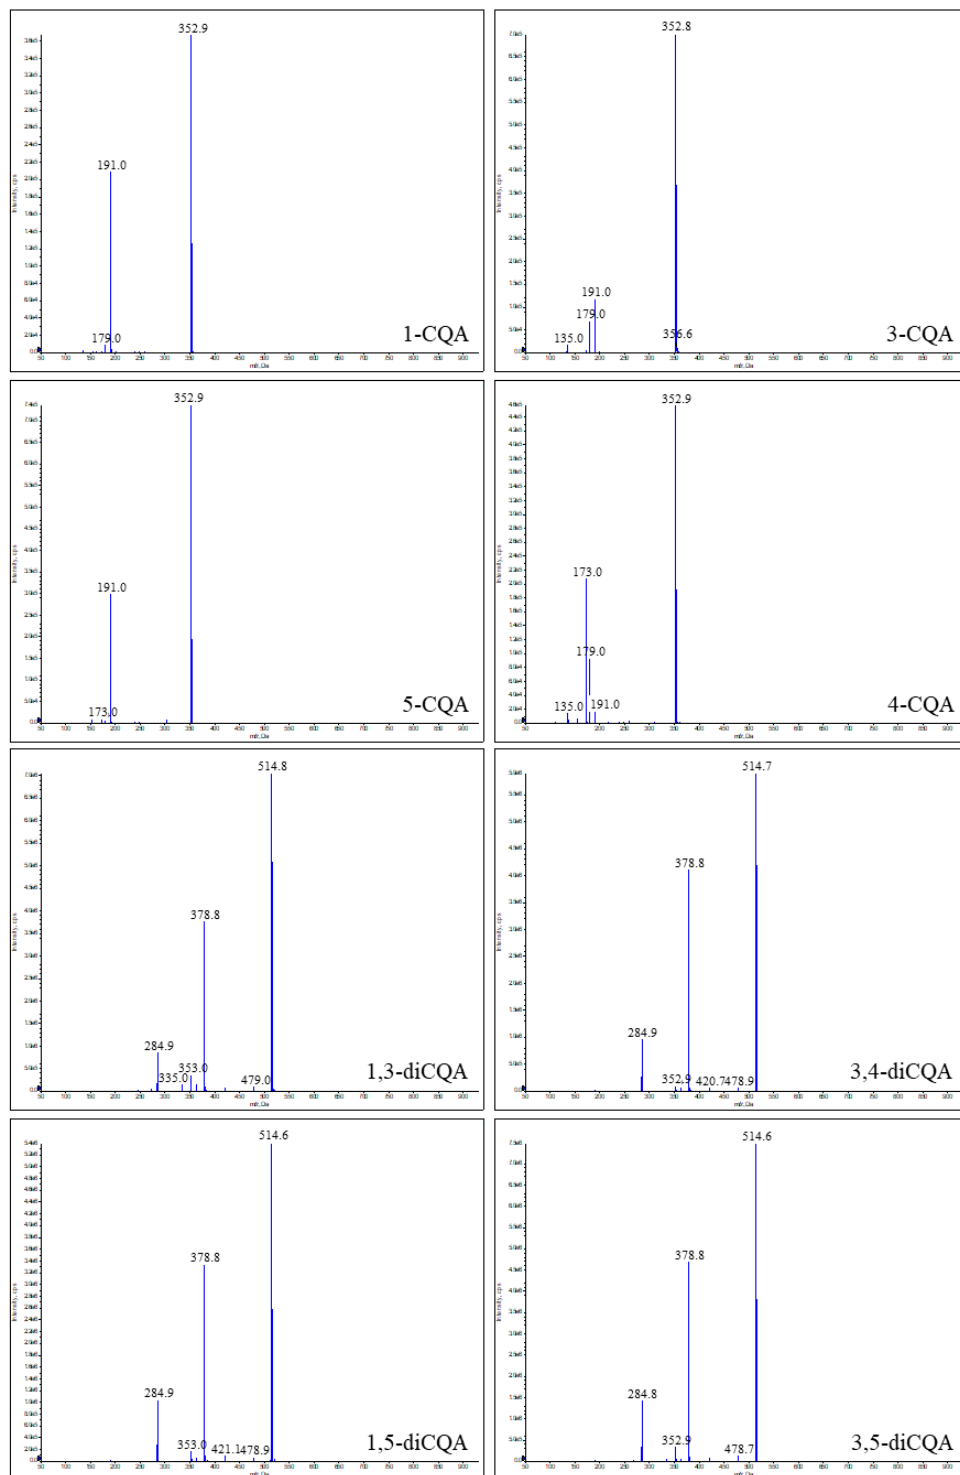

**Supplementary FIGURE S3 | Negative ion MS<sup>2</sup> spectra of monocatecholquinic acids and dicaffeoylquinic acids.** Enhanced Product Ion (EPI) profile of caffeoylquinic acid derivatives from authentic standards, including monocatecholquinic acids such as 1-, 3-, 4- and 5-CQA, and dicaffeoylquinic acids such as 1,3-, 1,5-, 3,4-, 3,5- and 4,5-diCQA.

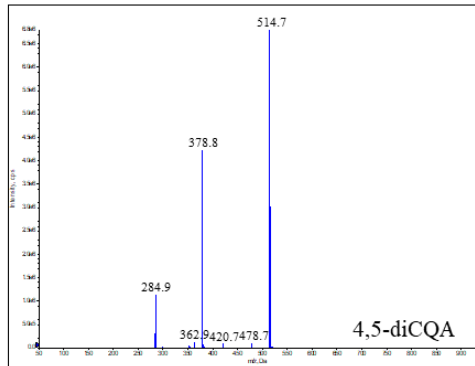

**Supplementary FIGURE S3 | Negative ion MS<sup>2</sup> spectra of moncaffeoylquinic acids and dicaffeoylquinic acids.** Enhanced Product Ion (EPI) profile of caffeoylquinic acid derivatives from authentic standards, including moncaffeoylquinic acids such as 1-, 3-, 4- and 5-CQA, and dicaffeoylquinic acids such as 1,3-, 1,5-, 3,4-, 3,5- and 4,5-diCQA. (continued)

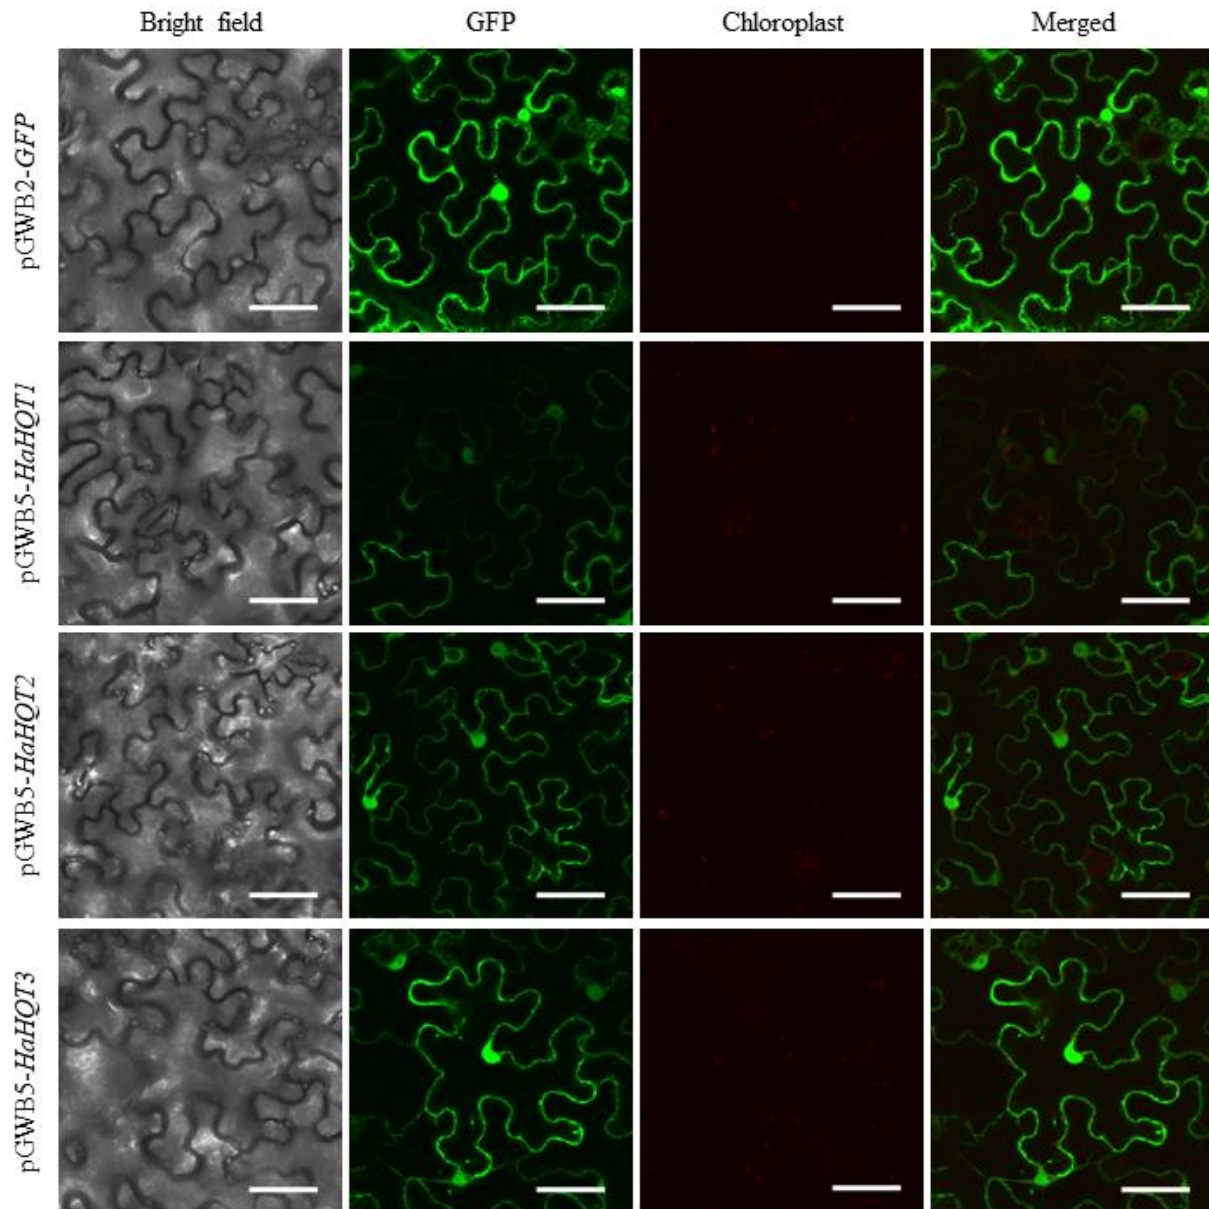

**Supplementary FIGURE S4** | Subcellular localization of GFP-tagged HaHQTs in the epidermis of *Nicotiana benthamiana* leaves. Confocal microscopy image of epidermal cells from *N. benthamiana* leaves infiltrated with pGWB2-GFP (control), pGWB5-HaHQT1, pGWB5-HaHQT2, or pGWB5-HaHQT3. Bars=50  $\mu$ m

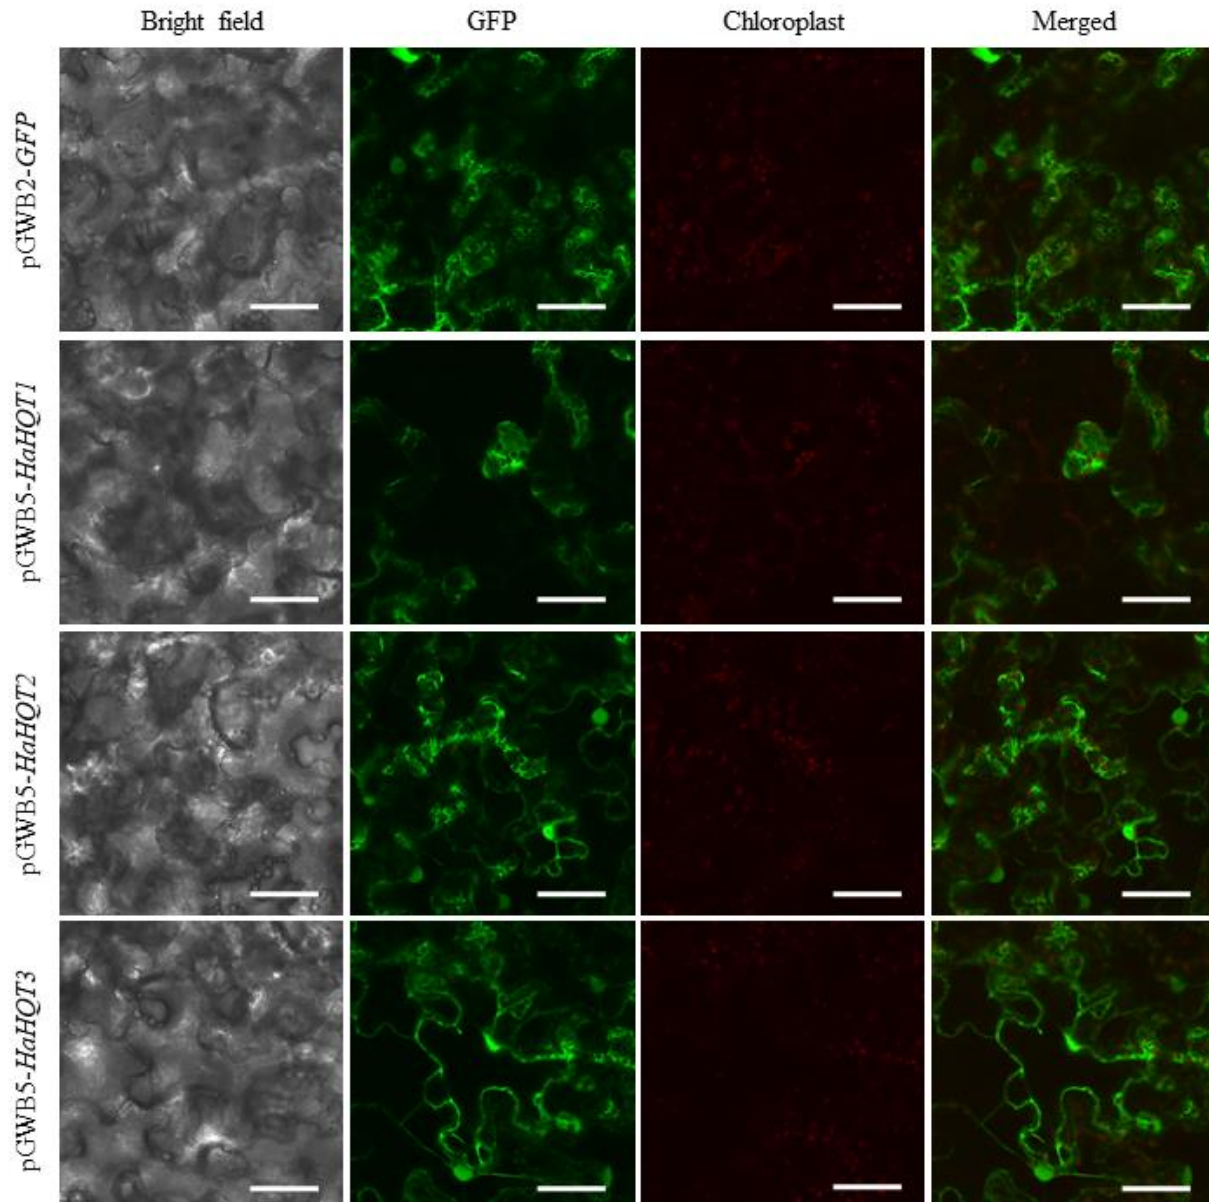

**Supplementary FIGURE S5** | Subcellular localization of GFP-tagged HaHQTs in the mesophyll of *Nicotiana benthamiana* leaves. Confocal microscopy image of epidermal cells from *N. benthamiana* leaves infiltrated with pGWB2-GFP (control), pGWB5-HaHQT1, pGWB5-HaHQT2, or pGWB5-HaHQT3. Bars=50  $\mu$ m



**Supplementary Table S1 | All primers used in this study.**

| Experiment               | Gene           | Accession number      | Primer Sequence (5'→3')      |                                  | Product size (bp) |
|--------------------------|----------------|-----------------------|------------------------------|----------------------------------|-------------------|
|                          |                |                       | Forward                      | Reverse                          |                   |
| Cloning                  | <i>HaHQ1</i>   | MK598073              | ATGAACCTAACAGTAAAACAATCACTAA | CTAGAAATCATACAAAACGTTCCCTTAAA    | 1,305             |
|                          | <i>HaHQ2</i>   | MK598074              | ATGAAAACCGATCAAACCCAAA       | TTACAATTCATACAAGTACTTCTCAAAAA    | 1,323             |
|                          | <i>HaHQ3</i>   | MK598075              | ATGGGGACTGTTCAAAGAGACA       | TTAGAAAGTCGTATAAGAAGTCTCTCAAAACA | 1,326             |
| Subcellular localization | <i>HaHQ1</i>   | MK598073              | ATGAACCTAACAGTAAAACAATCACTAA | GAAATCATACAAAACGTTCCCTTAAA       | 1,302             |
|                          | <i>HaHQ2</i>   | MK598074              | ATGAAAACCGATCAAACCCAAA       | CAATTCATACAAGTACTTCTCAAAAA       | 1,320             |
|                          | <i>HaHQ3</i>   | MK598075              | ATGGGGACTGTTCAAAGAGACA       | GAAGTCGTATAAGAAGTCTCTCAAAACA     | 1,323             |
|                          | <i>ETIF5</i>   | XM_022156448.1        | TTGTGCCCCGTGCCCATAAC         | AAATCTGCTCCTCCCCCATC             | 231               |
| <i>EF12</i>              | XM_022137686.1 | TTGACCCGCTAAGCCACGTTT | AGGCACCAGAAAAACCCGAAT        | 199                              |                   |
| <i>ACT7</i>              | XM_022154554.1 | TTGGAATGGAAGCTGCTGGT  | CTGGAGGAGCAACCCACCTTG        | 201                              |                   |
| qRT-PCR /ddPCR           | <i>HaHQ1</i>   | MK598073              | ACCGCAAGGAGAAATCCACAA        | CGTCCCCATCCAAAAGTCAGA            | 194               |
|                          | <i>HaHQ2</i>   | MK598074              | TGGTAAACGCTGCGAAACTG         | GTCGGGGTCCCATAAAAT               | 223               |
|                          | <i>HaHQ3</i>   | MK598075              | CCCCGATGACCAACTAACCA         | GCTGATAGATCGGGCTGCAC             | 246               |
|                          | <i>HaHCT1</i>  | MK598076              | GAGCTGCAGCCCCGATCTAAA        | CCGGGCTTGGTAACACAAAA             | 184               |
|                          | <i>HaHCT2</i>  | MK598077              | CGGCGCTTGATTACTTGGAG         | CACCAGGCCCCCATGAATATG            | 159               |

**Supplementary Table S2 | List of regulatory elements found in the promoter regions of *HaHQT2* and *HaHQT3*.**

| IUPAC family | Number of elements found  |                           | Function                                                                                                                            |
|--------------|---------------------------|---------------------------|-------------------------------------------------------------------------------------------------------------------------------------|
|              | <i>HaHQT2</i><br>promoter | <i>HaHQT3</i><br>promoter |                                                                                                                                     |
| P\$FAM002    | 3                         | 12                        | light responsiveness, auxin/ salicylic acid/ abscisic acid/ jasmonate responsiveness, stress regulation, dehydration responsiveness |
| P\$FAM003    | 5                         | 3                         | phenylpropanoid biosynthesis, phytochrome regulation, MYB                                                                           |
| P\$FAM008    | 1                         | 1                         | water stress responsiveness, MYB                                                                                                    |
| P\$FAM010    | 8                         | 4                         | elicitor responsiveness, defense response regulation, salicylic acid responsiveness, sucrose responsiveness                         |
| P\$FAM012    | 3                         | 7                         | light responsiveness, light regulation, MYB                                                                                         |
| P\$FAM013    | 1                         | 3                         | abscisic acid responsiveness, dehydration responsiveness, low temperature responsiveness                                            |
| P\$FAM014    | 4                         | 8                         | phytochrome regulation, sugar repression, MYB                                                                                       |
| P\$FAM015    | 0                         | 2                         | sugar repression                                                                                                                    |
| P\$FAM022    | 3                         | 1                         | storage protein                                                                                                                     |
| P\$FAM024    | 3                         | 4                         | storage protein                                                                                                                     |
| P\$FAM025    | 1                         | 0                         | sugar repression                                                                                                                    |
| P\$FAM026    | 1                         | 0                         | light responsiveness                                                                                                                |
| P\$FAM027    | 2                         | 1                         | light regulation, circadian rhythms                                                                                                 |
| P\$FAM061    | 1                         | 1                         | pathogen, ethylene, and jasmonate responsiveness                                                                                    |
| P\$FAM069    | 1                         | 2                         | auxin responsiveness, sulfur responsiveness                                                                                         |
| P\$FAM085    | 0                         | 1                         | light responsiveness                                                                                                                |
| P\$FAM098    | 0                         | 2                         | auxin responsiveness                                                                                                                |
| P\$FAM099    | 1                         | 0                         | phytochrome responsiveness                                                                                                          |
| P\$FAM107    | 1                         | 1                         | sugar starvation                                                                                                                    |
| P\$FAM116    | 1                         | 0                         | abscisic acid and drought responsiveness                                                                                            |
| P\$FAM124    | 1                         | 0                         | ethylene responsiveness                                                                                                             |
| P\$FAM162    | 2                         | 1                         | low temperature responsive element                                                                                                  |
| P\$FAM170    | 1                         | 1                         | gibberellin responsiveness, MYB                                                                                                     |
| P\$FAM171    | 1                         | 5                         | MYB                                                                                                                                 |
| P\$FAM172    | 4                         | 2                         | dehydration responsiveness                                                                                                          |
| P\$FAM205    | 0                         | 2                         | gibberellin responsiveness and sugar repression, Dof                                                                                |
| P\$FAM227    | 2                         | 0                         | storage protein                                                                                                                     |
| P\$FAM234    | 0                         | 1                         | storage protein                                                                                                                     |
| P\$FAM243    | 2                         | 6                         | storage protein                                                                                                                     |
| P\$FAM244    | 2                         | 0                         | storage protein                                                                                                                     |
| P\$FAM245    | 0                         | 2                         | storage protein                                                                                                                     |
| P\$FAM251    | 1                         | 0                         | light responsiveness                                                                                                                |
| P\$FAM261    | 2                         | 2                         | low temperature responsiveness                                                                                                      |

**Supplementary Table S2 | List of regulatory elements found in the promoter regions of *HaHQT2* and *HaHQT3*. (continue)**

| IUPAC family | Number of elements found  |                           | Function                                      |
|--------------|---------------------------|---------------------------|-----------------------------------------------|
|              | <i>HaHQT2</i><br>promoter | <i>HaHQT3</i><br>promoter |                                               |
| P\$FAM262    | 1                         | 0                         | light responsiveness and circadian expression |
| P\$FAM263    | 5                         | 3                         | abscisic acid responsiveness                  |
| P\$FAM266    | 6                         | 2                         | dehydration responsiveness, MYB               |
| P\$FAM267    | 10                        | 17                        | auxin responsiveness, Dof                     |
| P\$FAM273    | 1                         | 1                         | gibberellin responsiveness, sugar starvation  |
| P\$FAM290    | 7                         | 4                         | pathogen- and salt-induced                    |
| P\$FAM302    | 2                         | 3                         | light responsiveness, axillary bud outgrowth  |
| P\$FAM310    | 2                         | 1                         | cytokinin                                     |
| P\$FAM311    | 1                         | 1                         | low CO <sub>2</sub> , MYB                     |
| P\$FAM315    | 0                         | 1                         | light responsiveness                          |
| P\$FAM324    | 0                         | 2                         | calmodulin                                    |
| P\$FAM325    | 3                         | 0                         | cell cycle, MYB                               |
| P\$FAM329    | 0                         | 1                         | wood formation                                |
